# Supplementary material for: Ratiometric spiropyran-based fluorescent pH probe
Source: Royal Society of Chemistry journal article supplement (doi:10.1039/c3ra41456f), 2013-01-01
Supplement: c3ra41456f.pdf [file c3ra41456f.pdf]

## Electronic Supporting Information

### Ratiometric spiropyran-based fluorescent pH probe

Qi-Hua You,<sup>a</sup> Li Fan,<sup>b</sup> Wing-Hong Chan,<sup>\*a</sup> Albert W. M. Lee,<sup>a</sup> Shaomin Shuang<sup>b</sup>

<sup>a</sup>Department of Chemistry, Hong Kong Baptist University, Kowloon Tong, Hong Kong SAR, China. Fax: +852-3411-7348; Tel: +852-3411-7076; E-mail: whchan@life.hkbu.edu.hk

<sup>b</sup>Center of Environmental Science and Engineering Research, School of Chemistry and Chemical Engineering, Shanxi University, Taiyuan 030006, P. R. China

### Contents

|                    |                                                                                                                                                 | Page |
|--------------------|-------------------------------------------------------------------------------------------------------------------------------------------------|------|
| <b>Fig. S1</b>     | <sup>1</sup> H NMR spectrum of <b>2</b> .                                                                                                       | 2    |
| <b>Fig. S2</b>     | <sup>13</sup> C NMR spectrum of <b>2</b> .                                                                                                      | 2    |
| <b>Fig. S3</b>     | <sup>1</sup> H NMR spectrum of <b>3</b> .                                                                                                       | 3    |
| <b>Fig. S4</b>     | <sup>13</sup> C NMR spectrum of <b>3</b> .                                                                                                      | 3    |
| <b>Fig. S5</b>     | <sup>1</sup> H NMR spectrum of <b>4</b> .                                                                                                       | 4    |
| <b>Fig. S6</b>     | <sup>13</sup> C NMR spectrum of <b>4</b> .                                                                                                      | 4    |
| <b>Fig. S7</b>     | ESI-MS spectrum of <b>4</b> .                                                                                                                   | 5    |
| <b>Fig. S8</b>     | <sup>1</sup> H NMR spectrum of probe <b>1</b> .                                                                                                 | 5    |
| <b>Fig. S9</b>     | <sup>13</sup> C NMR spectrum of probe <b>1</b> .                                                                                                | 6    |
| <b>Fig. S10</b>    | MALDI-TOF HRMS spectrum of probe <b>1</b> .                                                                                                     | 6    |
| <b>Fig. S11</b>    | H, H-COSY spectrum of probe <b>1</b> .                                                                                                          | 7    |
| <b>Fig. S12</b>    | Partial H, H-COSY spectrum of probe <b>1</b> .                                                                                                  | 7    |
| <b>Fig. S13</b>    | 2D-NOESY spectrum of probe <b>1</b> .                                                                                                           | 8    |
| <b>Fig. S14-16</b> | Partial 2D-NOESY spectrum of probe <b>1</b> .                                                                                                   | 8-9  |
| <b>Fig. S17</b>    | Photo of probe <b>1</b> (50 μM) in ACN-phosphate buffer (20 mM, 1:1, v/v) at various pH.                                                        | 10   |
| <b>Fig. S18</b>    | Time course of fluorescence intensity at 517 nm of <b>1</b> (50 μM) in ACN-phosphate buffer (20 mM, 1:1, v/v) at various pH.                    | 10   |
|                    | Determination of pK <sub>a</sub> from fluorimetric titration                                                                                    | 10   |
| <b>Fig. S19</b>    | The calculation of pK <sub>a</sub> based on ratiometric response of probe <b>1</b> to H <sup>+</sup> concentration in pH range from 7.0 to 5.5. | 11   |
| <b>Fig. S20</b>    | Partial <sup>1</sup> H NMR titration spectra (1.0 – 4.4 ppm) of probe <b>1</b> with stepwise addition of TFA (0 – 3.2 equiv).                   | 11   |
| <b>Fig. S21</b>    | Partial <sup>1</sup> H NMR titration spectra (5.5 - 9.0 ppm) of probe <b>1</b> with stepwise addition of TFA (0 – 3.2 equiv).                   | 12   |
| <b>Fig. S22</b>    | <sup>1</sup> H NMR titration spectra of probe <b>1</b> with TFA (3.2 equiv) upon the stepwise addition of TEA (0 – 3.2 equiv).                  | 12   |
| <b>Fig. S23</b>    | Fluorescence spectra of <b>1</b> (50 μM) in ACN-phosphate buffer (20 mM, pH 4.0, 1:1, v/v) upon addition of various metal ions.                 | 13   |
| <b>Fig. S24</b>    | Fluorescence spectra of <b>1</b> (50 μM) in ACN-phosphate buffer (20 mM, pH 7.0, 1:1, v/v) upon addition of various metal ions.                 | 13   |

|                 |                                                                                                                                                                  |    |
|-----------------|------------------------------------------------------------------------------------------------------------------------------------------------------------------|----|
| <b>Fig. S25</b> | Photos of probe <b>1</b> (50 $\mu$ M) in ACN-phosphate buffer (20 mM, 1:1, v/v) at pH 4.0 (upper) and 7.0 (lower) upon addition of various metal ions (5 equiv). | 14 |
|-----------------|------------------------------------------------------------------------------------------------------------------------------------------------------------------|----|

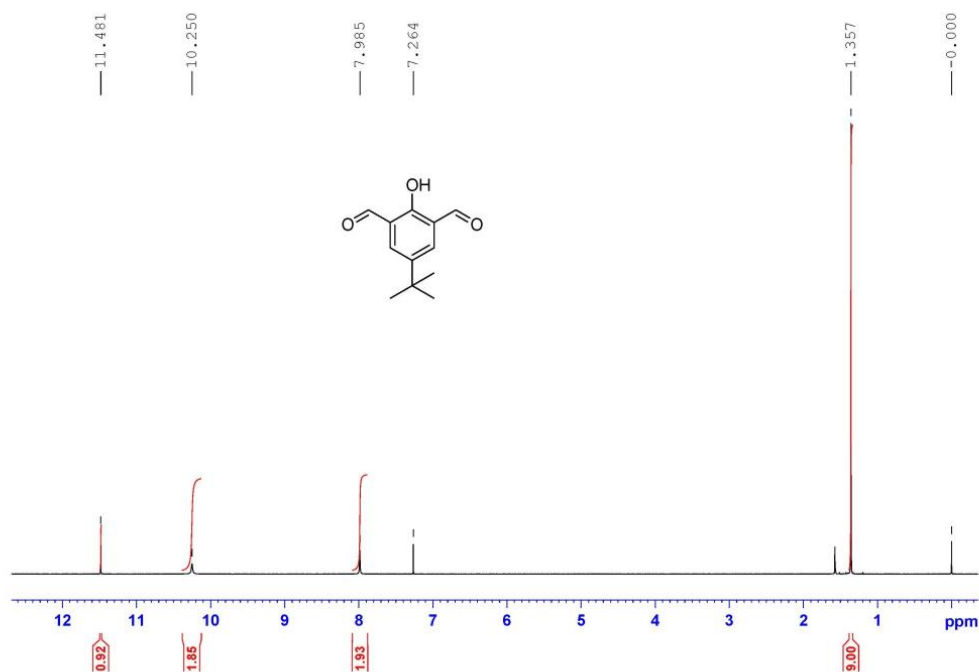

**Fig. S1** <sup>1</sup>H NMR spectrum of **2**.

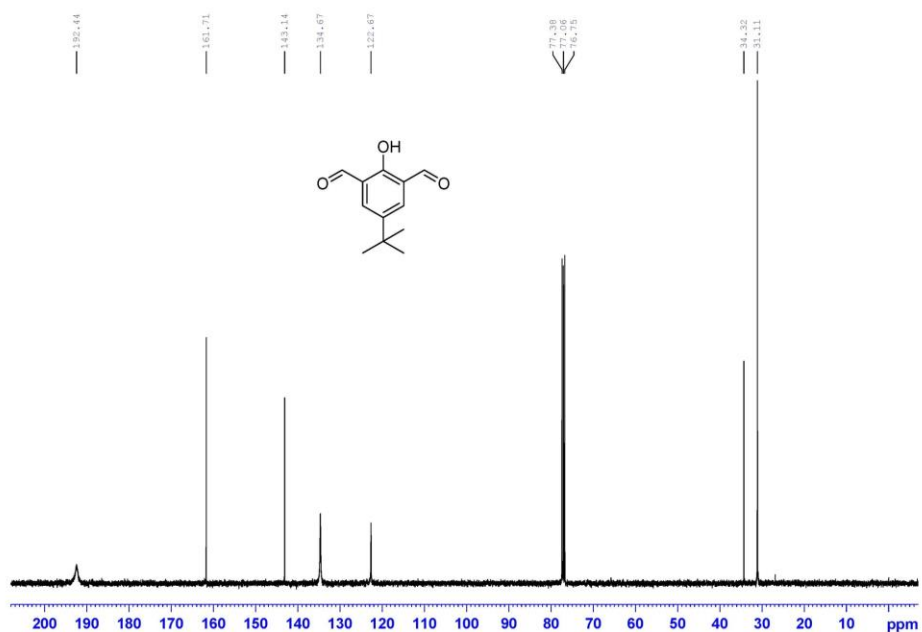

**Fig. S2** <sup>13</sup>C NMR spectrum of **2**.

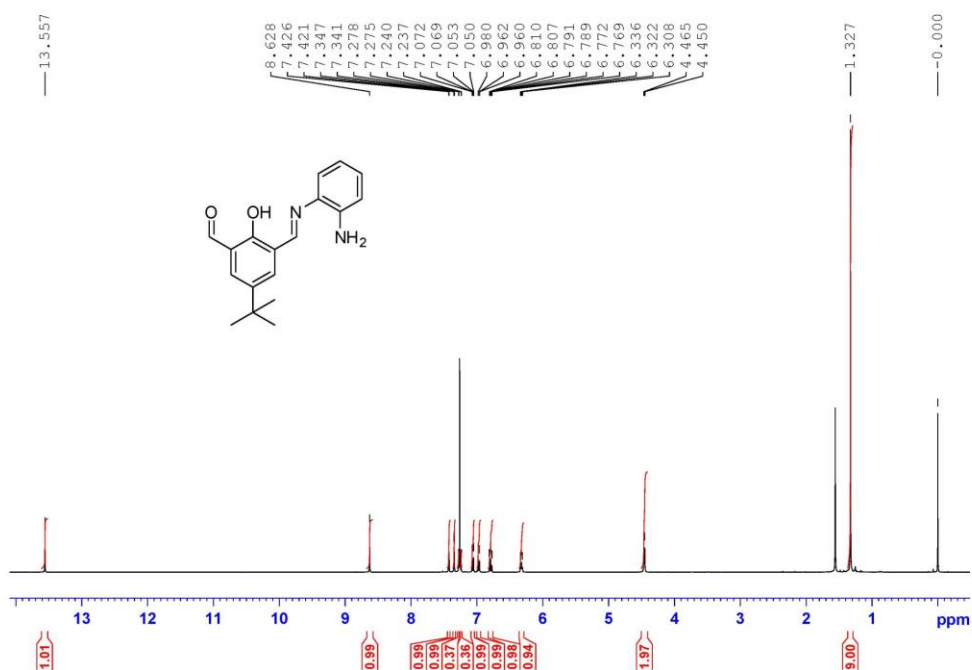

Fig. S3  $^1\text{H}$  NMR spectrum of 3.

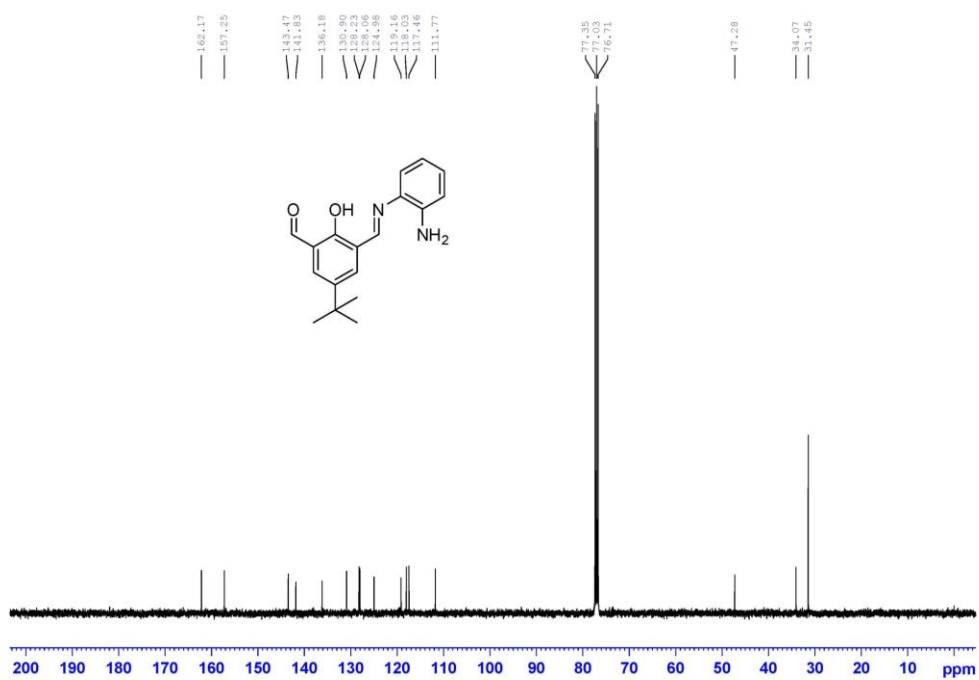

Fig. S4  $^{13}\text{C}$  NMR spectrum of 3.

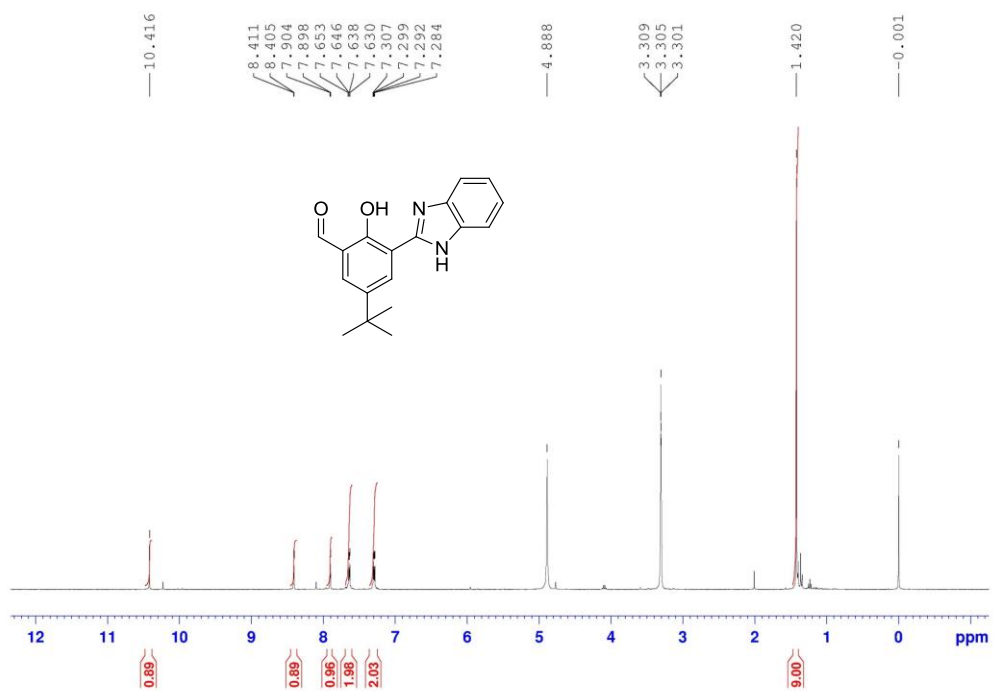

Fig. S5  $^1\text{H}$  NMR spectrum of 4.

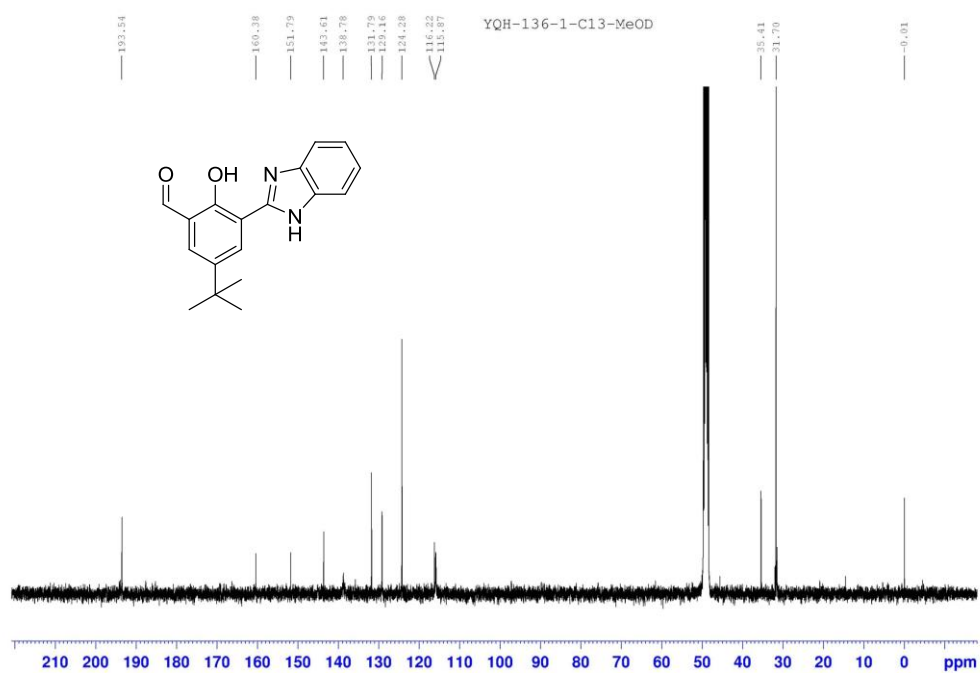

Fig. S6  $^{13}\text{C}$  NMR spectrum of 4.

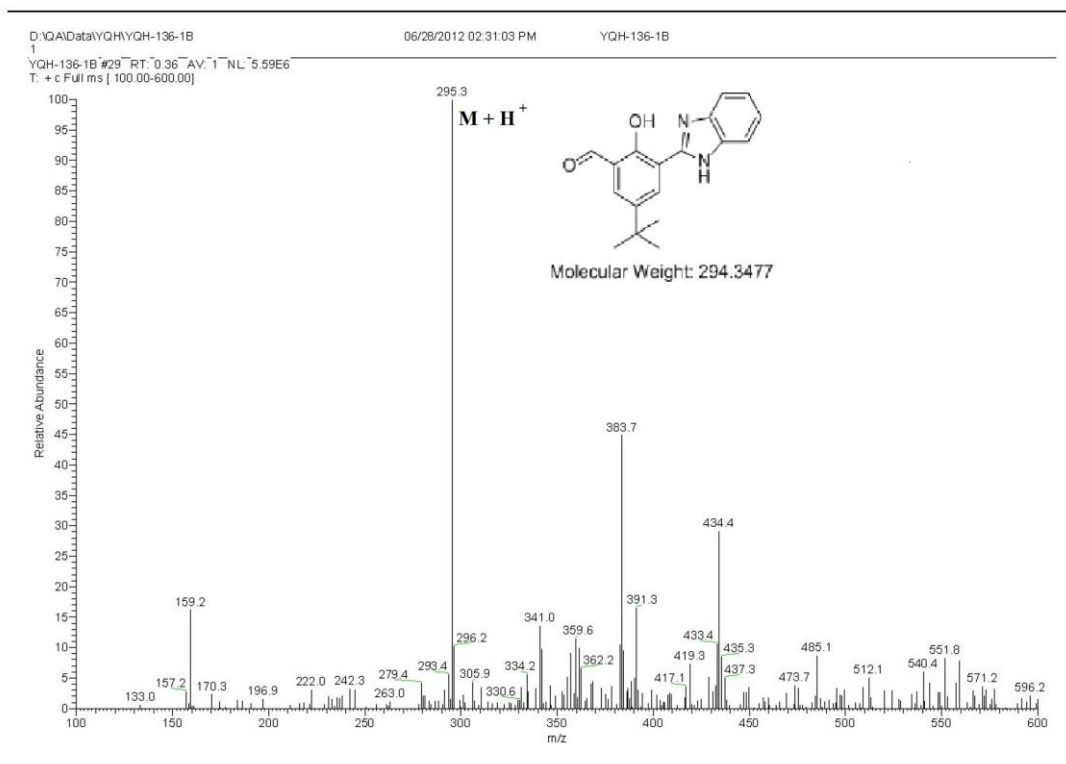

Fig. S7 ESI-MS spectrum of 4.

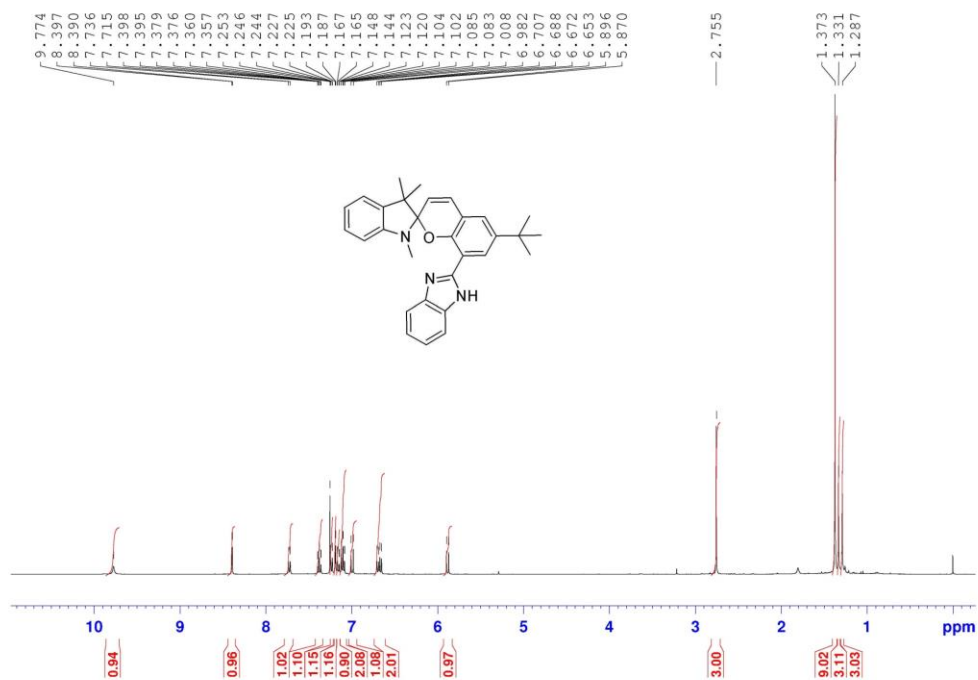

Fig. S8  $^1H$  NMR spectrum of probe 1.

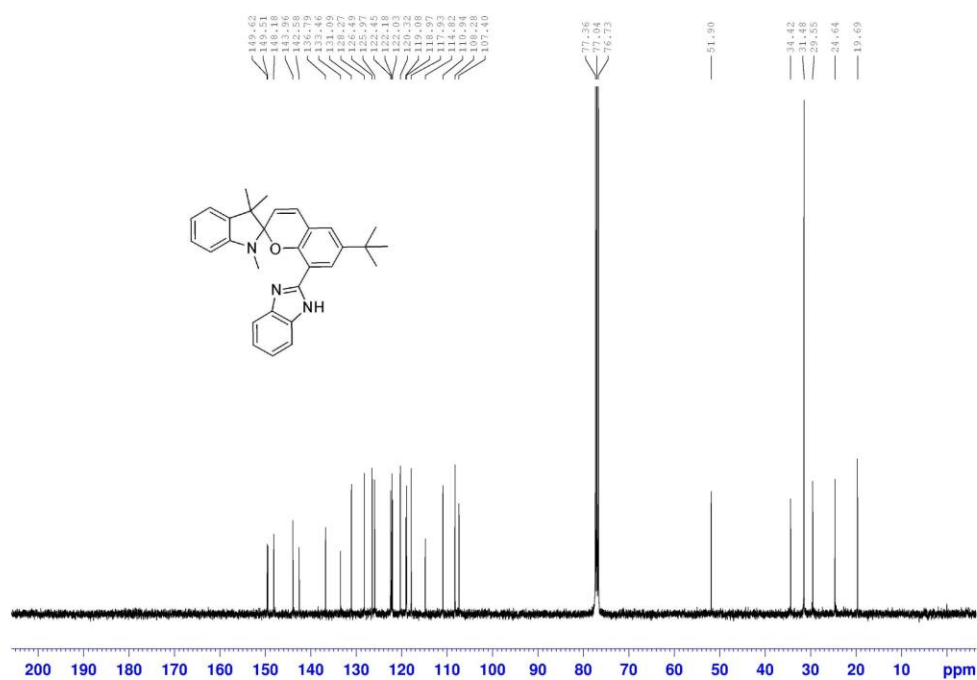

Fig. S9 <sup>13</sup>C NMR spectrum of probe 1.

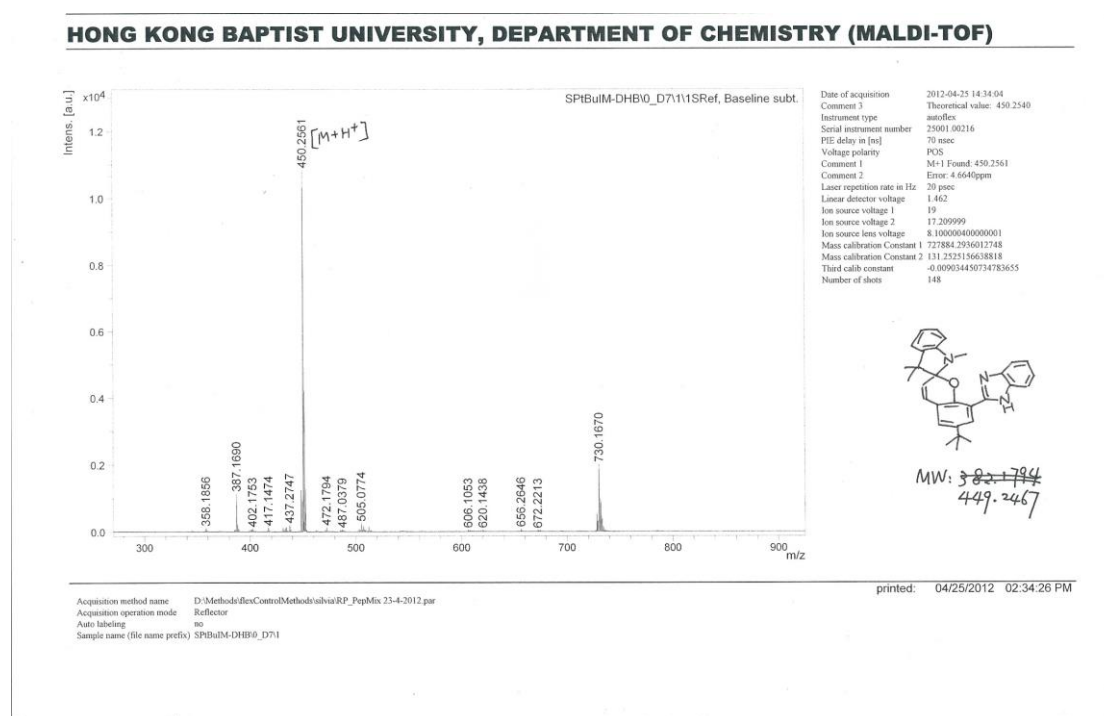

Fig. S10 MALDI-TOF HRMS spectrum of probe 1.

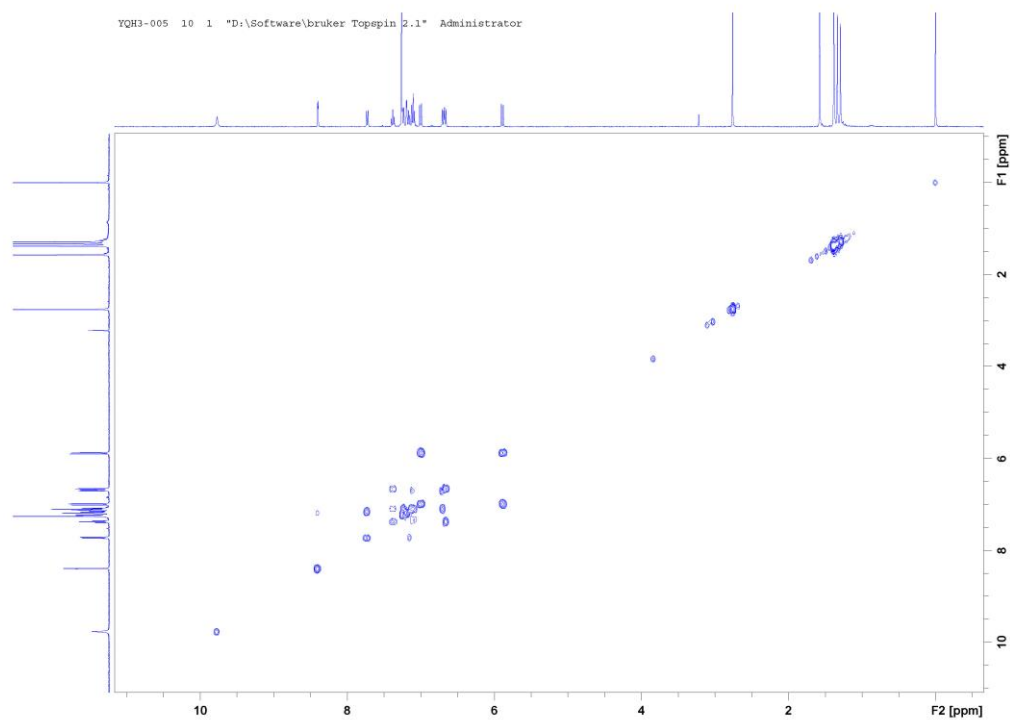

**Fig. S11** H, H-COSY spectrum of probe **1**.

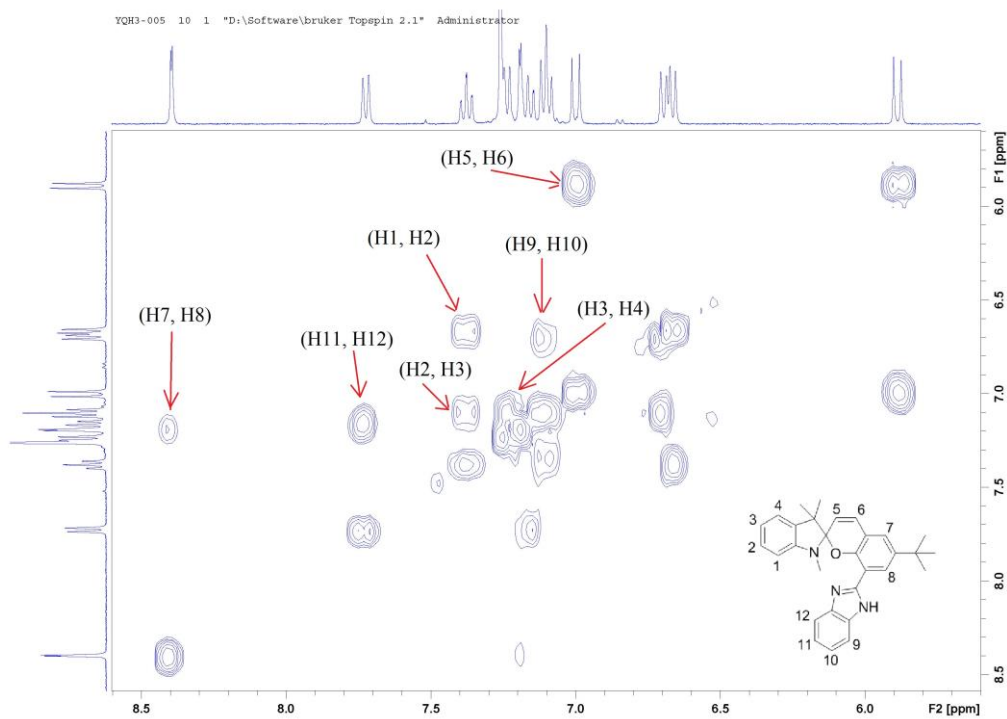

**Fig. S12** Partial H, H-COSY spectrum of probe **1**.

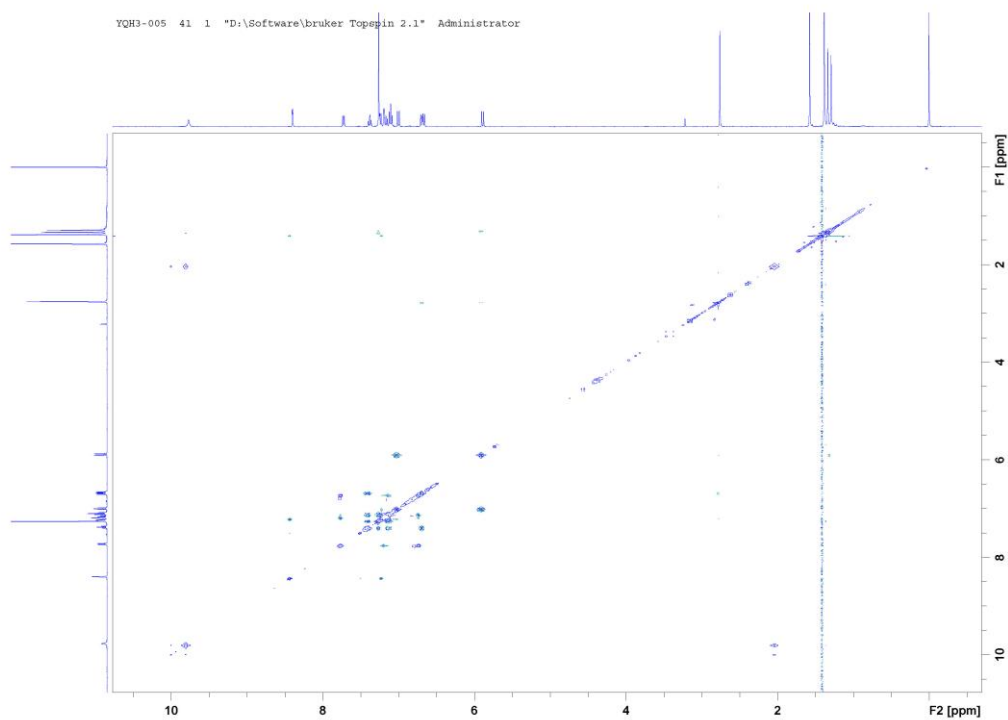

**Fig. S13** 2D-NOESY spectrum of probe 1.

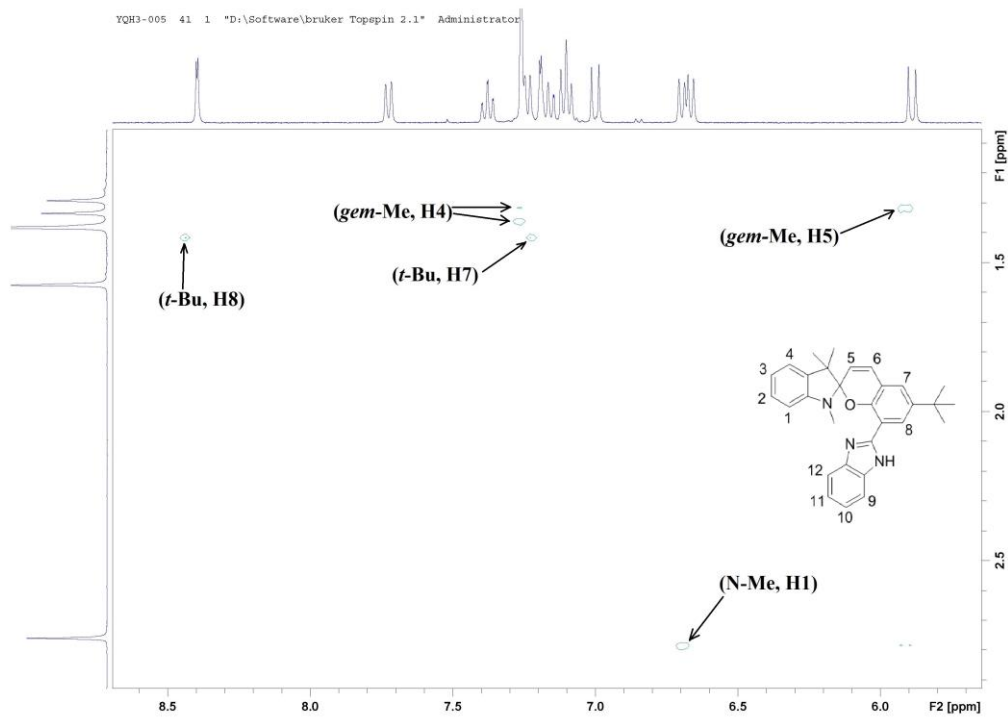

**Fig. S14** Partial 2D-NOESY spectrum of probe 1.



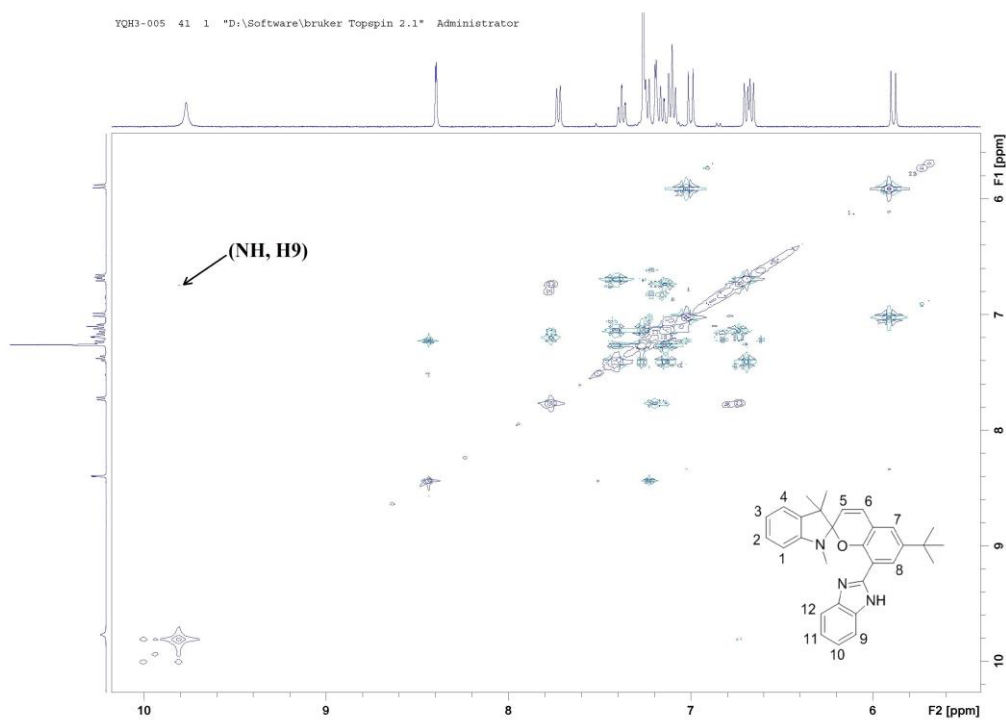

**Fig. S15** Partial 2D-NOESY spectrum of probe 1.

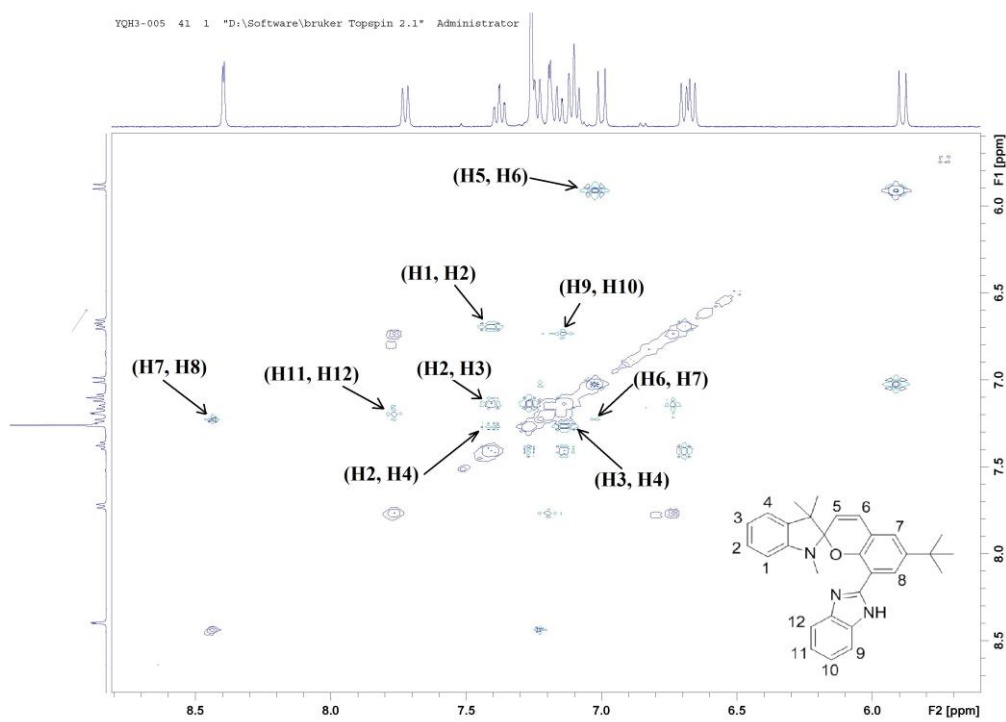

**Fig. S16** Partial 2D-NOESY spectrum of probe 1.

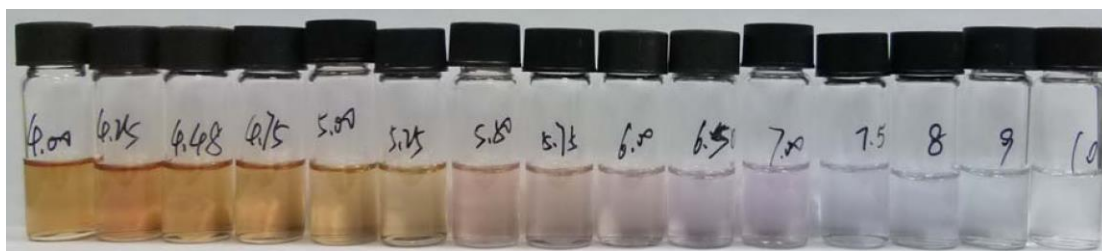

**Fig. S17** Photo of probe **1** (50  $\mu\text{M}$ ) in ACN-phosphate buffer (20 mM, 1:1, v/v) at various pH.

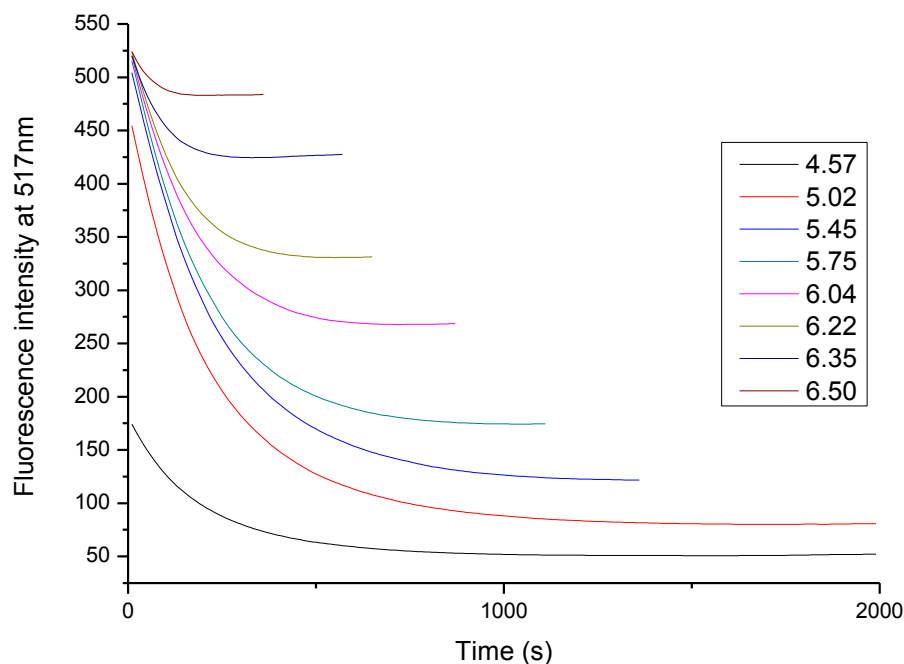

**Fig. S18** Time course of fluorescence intensity at 517 nm of **1** (50  $\mu\text{M}$ ) in ACN-phosphate buffer (20 mM, 1:1, v/v) at various pH.

## Determination of $pK_a$ from fluorimetric titration

The constants  $K_a$  of probe **1** was determined in aqueous buffered solution by fluorimetric titration as a function of pH using the fluorescence emission spectra. The expression of the steady-state fluorescence signal  $F$  as a function of the  $\text{H}^+$  concentration has been derived for the case of a  $n$ :1 complex between  $\text{H}^+$  and probe **1**,<sup>1-4</sup>

$$\text{equation 1: } F = \frac{F_{\max}[\text{H}^+]^n + F_{\min}K_a}{K_a + [\text{H}^+]^n} \quad (1)$$

In our experiments, probe **1** showed a ratiometric response to  $\text{H}^+$  concentration in the range 7.0 to 5.5, thus, the fluorescence signals  $F_{\min}$  and  $F_{\max}$  were considered as the ratio of  $I_{690 \text{ nm}}/I_{517 \text{ nm}}$  at minimal and maximal  $\text{H}^+$  concentration, respectively, and  $n$  was considered as 1 (the stoichiometry of  $\text{H}^+$  for spiropyran ring opening). Then we get a  $pK_a$  of 5.9.

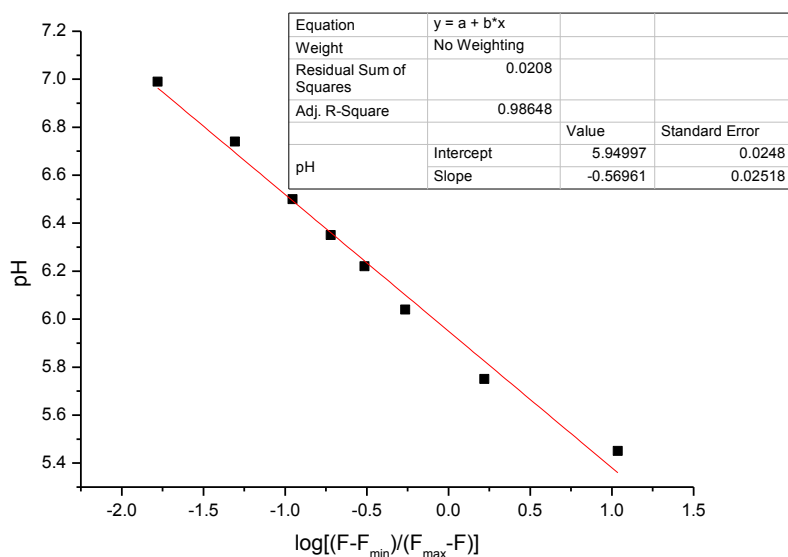

**Fig. S19** The calculation of  $pK_a$  based on ratiometric response of probe **1** to  $H^+$  concentration in pH range from 7.0 to 5.5.

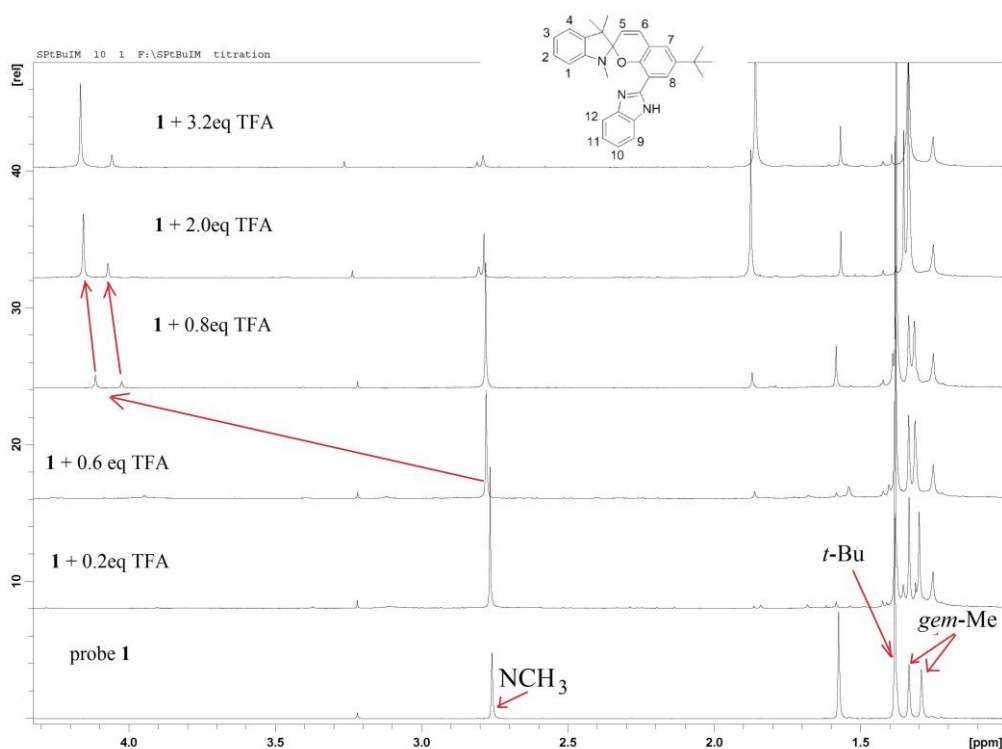

**Fig. S20** Partial  $^1H$  NMR titration spectra (1.0 – 4.4 ppm) of probe **1** with stepwise addition of TFA (0 – 3.2 equiv).

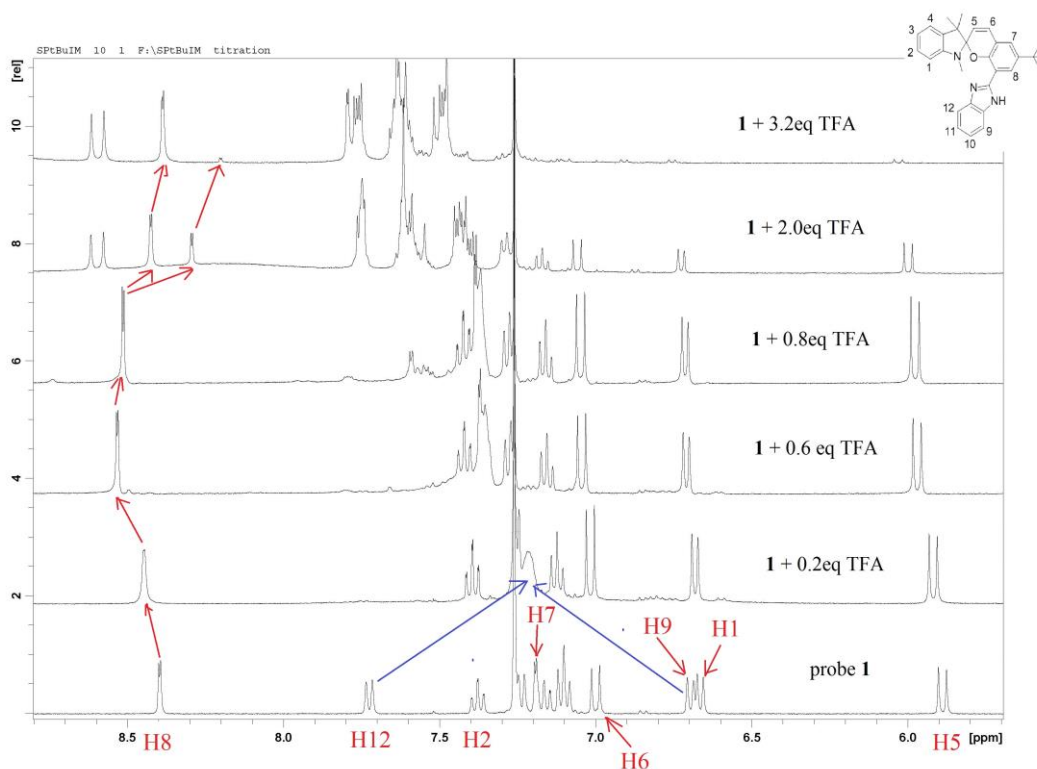

**Fig. S21** Partial <sup>1</sup>H NMR titration spectra (5.5 - 9.0 ppm) of probe **1** with stepwise addition of TFA (0 – 3.2 equiv).

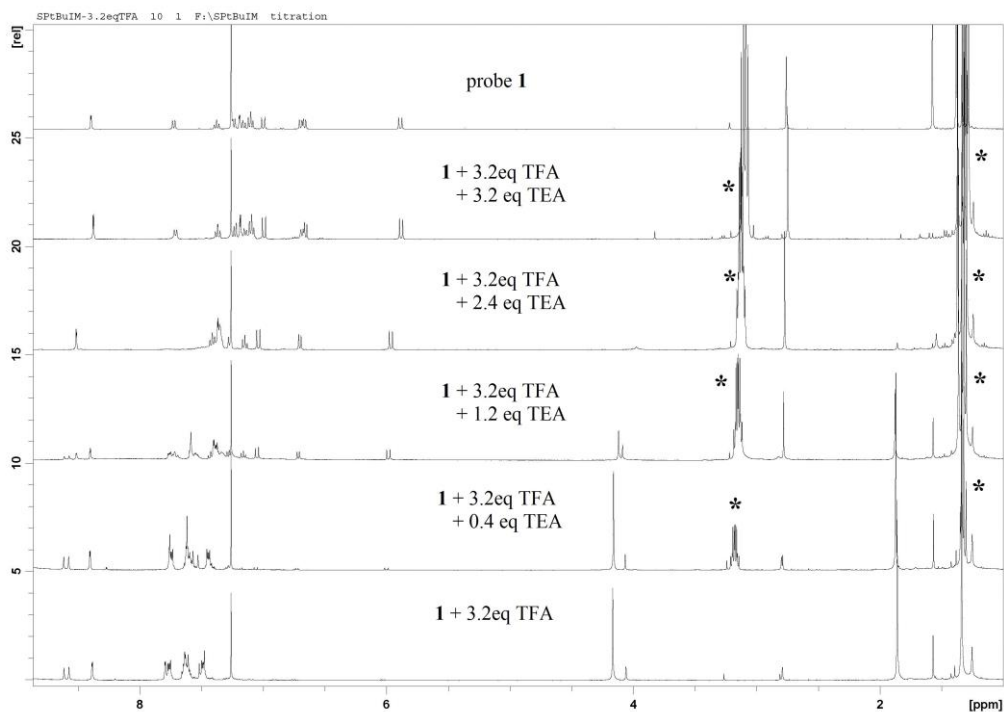

**Fig. S22** <sup>1</sup>H NMR titration spectra of probe **1** with TFA (3.2 equiv) upon the stepwise addition of TEA (0 – 3.2 equiv). Peaks \* were attributed to the protons of TEA.

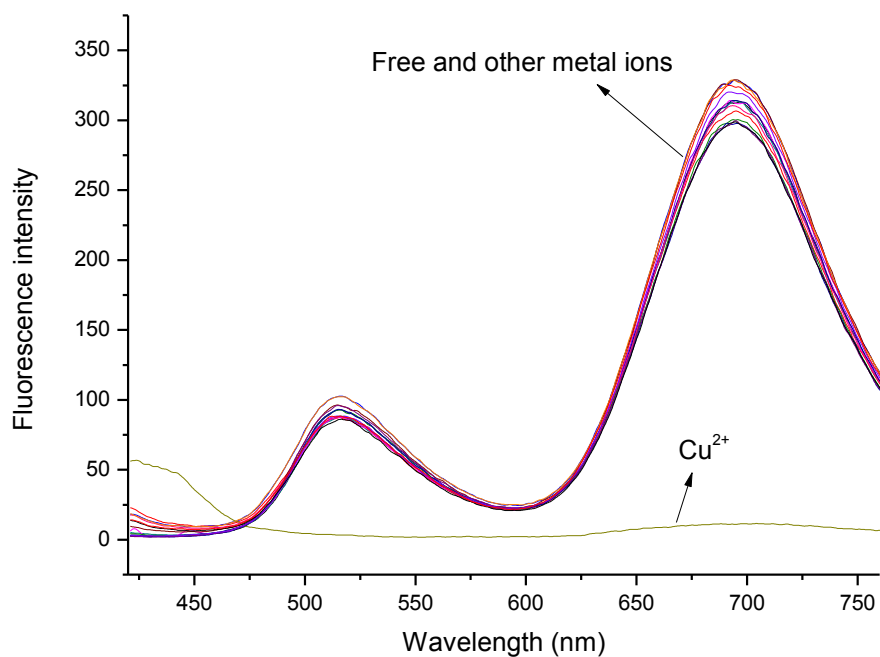

**Fig. S23** Fluorescence spectra of **1** (50  $\mu\text{M}$ ) in ACN-phosphate buffer (20 mM, pH 4.0, 1:1, v/v) upon addition of various metal ions:  $\text{Na}^+$  (150 mM),  $\text{K}^+$  (150 mM),  $\text{Ca}^{2+}$  (3 mM),  $\text{Mg}^{2+}$  (3 mM),  $\text{Li}^+$  (50  $\mu\text{M}$ ),  $\text{Ag}^+$  (50  $\mu\text{M}$ ),  $\text{Cu}^{2+}$  (50  $\mu\text{M}$ ),  $\text{Fe}^{2+}$  (50  $\mu\text{M}$ ),  $\text{Fe}^{3+}$  (50  $\mu\text{M}$ ),  $\text{Zn}^{2+}$  (50  $\mu\text{M}$ ),  $\text{Co}^{2+}$  (50  $\mu\text{M}$ ),  $\text{Ni}^{2+}$  (50  $\mu\text{M}$ ),  $\text{Cd}^{2+}$  (50  $\mu\text{M}$ ),  $\text{Hg}^{2+}$  (50  $\mu\text{M}$ ),  $\text{Pb}^{2+}$  (50  $\mu\text{M}$ ).

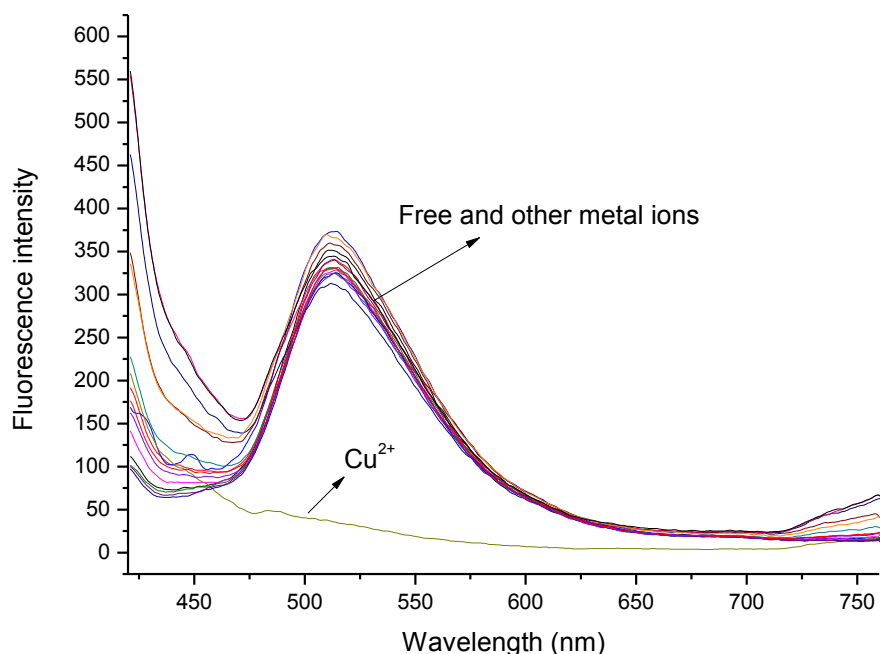

**Fig. S24** Fluorescence spectra of **1** (50  $\mu\text{M}$ ) in ACN-phosphate buffer (20 mM, pH 7.0, 1:1, v/v) upon addition of various metal ions:  $\text{Na}^+$  (150 mM),  $\text{K}^+$  (150 mM),  $\text{Ca}^{2+}$  (3 mM),  $\text{Mg}^{2+}$  (3 mM),  $\text{Li}^+$  (50  $\mu\text{M}$ ),  $\text{Ag}^+$  (50  $\mu\text{M}$ ),  $\text{Cu}^{2+}$  (50  $\mu\text{M}$ ),  $\text{Fe}^{2+}$  (50  $\mu\text{M}$ ),  $\text{Fe}^{3+}$  (50  $\mu\text{M}$ ),  $\text{Zn}^{2+}$  (50  $\mu\text{M}$ ),  $\text{Co}^{2+}$  (50  $\mu\text{M}$ ),  $\text{Ni}^{2+}$  (50  $\mu\text{M}$ ),  $\text{Cd}^{2+}$  (50  $\mu\text{M}$ ),  $\text{Hg}^{2+}$  (50  $\mu\text{M}$ ),  $\text{Pb}^{2+}$  (50  $\mu\text{M}$ ).

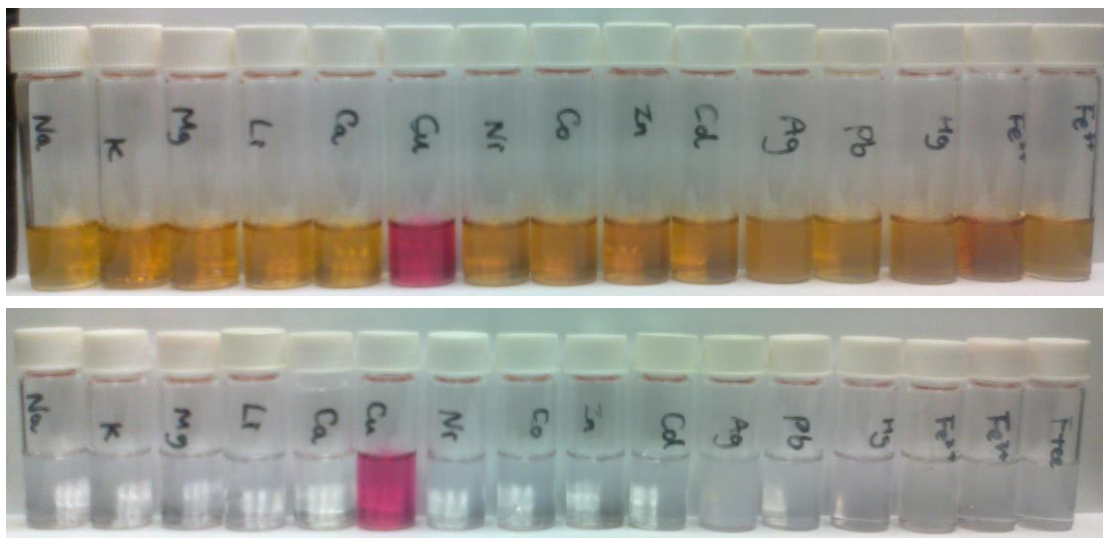

**Fig. S25** Photos of probe **1** (50  $\mu$ M) in ACN-phosphate buffer (20 mM, 1:1, v/v) at pH 4.0 (upper) and 7.0 (lower) upon addition of various metal ions (5 equiv).

## References:

1. E. Cielen, A. Tahri, K. Ver Heyen, G. J. Hoornaert, F. C. De Schryver and N. Boens, *J. Chem. Soc., Perkin Trans. 2*, 1998, 1573-1580.
2. W. Qin, M. Baruah, A. Stefan, M. Van der Auweraer and N. Boens, *Chem. Phys. Chem.*, 2005, **6**, 2343-2351.
3. M. Baruah, W. Qin, N. Basarić, W. M. De Borggraeve and N. Boens, *J. Org. Chem.*, 2005, **70**, 4152-4157.
4. J. E. Whitaker, R. P. Haugland and F. G. Prendergast, *Anal. Biochem.*, 1991, **194**, 330-344.
